# Supplementary material for: CD47 promotes ovarian cancer progression by inhibiting macrophage phagocytosis
Source: PubMed Central journal article supplement (PMC5503592; doi:10.18632/oncotarget.16547), 2017-03-24
Supplement: oncotarget-08-39021-s001.pdf [file oncotarget-08-39021-s001.pdf]

## CD47 promotes ovarian cancer progression by inhibiting macrophage phagocytosis

### SUPPLEMENTARY MATERIALS

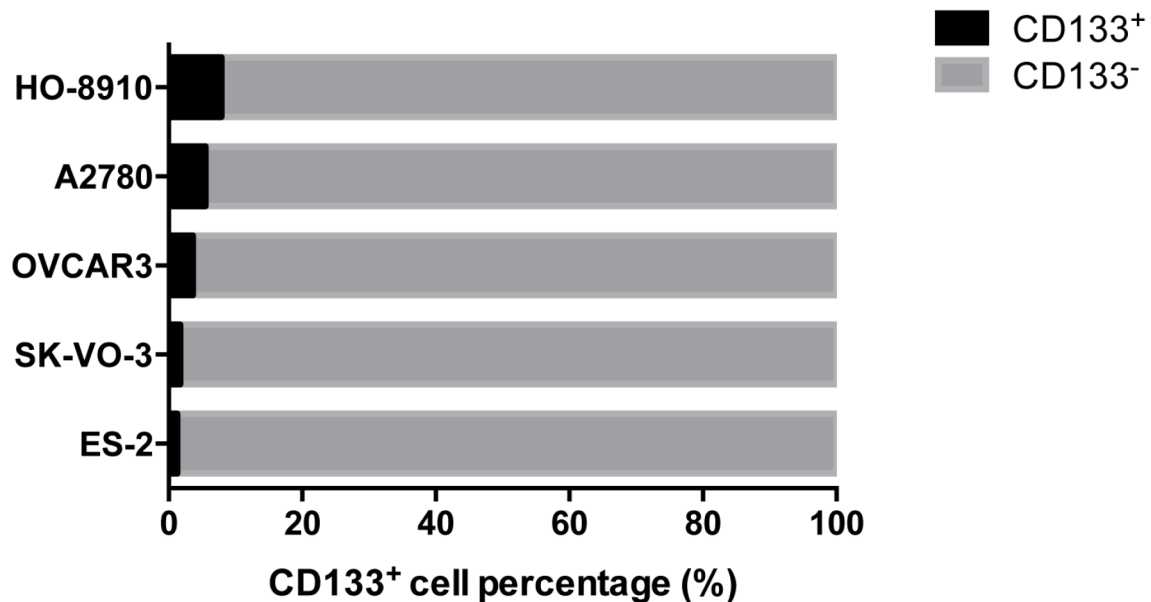

**Supplementary Figure 1: Distribution of CD133<sup>+</sup> and CD133<sup>-</sup> subpopulations in ovarian cancer cell lines.** Distribution of the CD133<sup>+</sup> and CD133<sup>-</sup> subpopulations were measured by flow-cytometry. CD133 was labelled with PE-conjugated anti human CD133 antibody (AC133, Miltenyi Biotec, 130-080-801). Flow cytometry data were acquired using a FACS C6 Flow Cytometer (Accuri Cytometer). At least 30,000 events were collected each analysis. All of the data were further analyzed by FlowJo software (Tree Star).

**Supplementary Table 1: Tumor metastasis in mice xenografted with SK-OV-3 cells transfected with scramble shRNA or shCD47**

| Group          | Numbers of tumor metastasis |
|----------------|-----------------------------|
| Scramble (N=5) | 55, 74, 70, 82, 97          |
| shCD47 (N=5)   | 30, 42, 52, 61, 67          |

**Supplementary Table 2: Tumor metastasis in anti-HLA antibody treated control mice and anti-CD47 mAb treated mice**

| Group           | Numbers of tumor metastasis |
|-----------------|-----------------------------|
| Anti-HLA (N=5)  | 66, 71, 80, 88, 92          |
| Anti-CD47 (N=5) | 47, 52, 55, 72, 75          |
